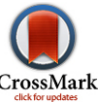

# The Effects of Chronic Cigarette Smoking on Gray Matter Volume: Influence of Sex

Teresa R. Franklin<sup>1†\*</sup>, Reagan R. Wetherill<sup>1†</sup>, Kanchana Jagannathan<sup>1</sup>, Barbara Johnson<sup>1</sup>, Joel Mumma<sup>1</sup>, Nathan Hager<sup>1</sup>, Hengyi Rao<sup>2</sup>, Anna Rose Childress<sup>1</sup>

**1** Perelman School of Medicine at the University of Pennsylvania, Department of Psychiatry, Philadelphia, Pennsylvania, United States of America, **2** Perelman School of Medicine at the University of Pennsylvania, Center for Functional Neuroimaging, Philadelphia, Pennsylvania, United States of America

## Abstract

Cigarette smoke contains nicotine and toxic chemicals and may cause significant neurochemical and anatomical brain changes. Voxel-based morphometry studies have examined the effects of smoking on the brain by comparing gray matter volume (GMV) in nicotine dependent individuals (NDs) to nonsmoking individuals with inconsistent results. Although sex differences in neural and behavioral features of nicotine dependence are reported, sex differences in regional GMV remain unknown. The current study examined sex differences in GMV in a large sample of 80 NDs (41 males) and 80 healthy controls (41 males) using voxel-based morphometry. Within NDs, we explored whether GMV was correlated with measures of cigarette use and nicotine dependence. High-resolution T1 structural scans were obtained from all participants. Segmentation and registration were performed in SPM8 using the optimized DARTEL approach. Covariates included age and an estimate of total global GMV. Differences were considered significant at  $p \leq 0.001$ , with a whole brain FWE-corrected cluster probability of  $p < 0.025$ . Among NDs compared to Controls less GMV was observed in the thalamus and bilateral cerebellum and greater GMV was observed in the bilateral putamen and right parahippocampus. Lower thalamic GMV was observed in both female and male NDs compared to Controls. Female NDs also had lower GMV in the left cerebellum and in the ventral medial and orbitofrontal cortices with no areas of greater GMV. Male NDs had lower GMV in bilateral cerebellum and greater GMV in bilateral parahippocampus and left putamen. Within male NDs, GMV in the left putamen was correlated with number of pack years. This study, conducted in a large cohort, contributes to our knowledge of brain morphology in nicotine addiction and provides additional evidence of sex-specific effects on GMV in NDs. Identifying brain vulnerabilities with respect to sex provides a methodological framework for personalized therapies to improve relapse rates for both sexes.

**Citation:** Franklin TR, Wetherill RR, Jagannathan K, Johnson B, Mumma J, et al. (2014) The Effects of Chronic Cigarette Smoking on Gray Matter Volume: Influence of Sex. PLoS ONE 9(8): e104102. doi:10.1371/journal.pone.0104102

**Editor:** Yu-Feng Zang, Hangzhou Normal University, China

**Received:** April 11, 2014; **Accepted:** July 6, 2014; **Published:** August 4, 2014

**Copyright:** © 2014 Franklin et al. This is an open-access article distributed under the terms of the Creative Commons Attribution License, which permits unrestricted use, distribution, and reproduction in any medium, provided the original author and source are credited.

**Data Availability:** The authors confirm that all data underlying the findings are fully available without restriction. All relevant data are within the paper and its Supporting Information files.

**Funding:** This study was supported by grants received from National Institutes of Health (R21 DA032022 (HR), R21 DA25882 (TF), R03 DA027098 (HR), R01 HL102119 (HR), R01 DA029845 (TF), R01 DA030394-01A1 (TF)) and Pfizer Pharma (Investigator-initiated Award) (TF) and a pilot grant from the Institute for Translational Medicine and Therapeutics (ITMAT) of the University of Pennsylvania (HR). The funders had no role in study design, data collection and analysis, decision to publish, or preparation of the manuscript.

**Competing Interests:** Hengyi Rao is a PLOS ONE editorial board member. This does not alter the authors' adherence to PLOS ONE Editorial policies and criteria. One of the authors' sources of funding is Pfizer Pharma. This does not alter the authors' adherence to PLOS ONE policies on sharing data and materials. Further, there are no restrictions on sharing of data and/or materials.

\* Email: teresafr@mail.med.upenn.edu

† TRF and RRW are joint first authors on this work

## Introduction

Cigarette smoking is the leading cause of preventable morbidity and premature mortality worldwide [1]. Although most nicotine dependent individuals (NDs) express the desire to quit smoking, relapse rates remain high [2,3]. Preclinical studies indicate that chronic exposure to nicotine, the addictive component in cigarettes, causes significant neurochemical and pathological brain changes in fetal and adolescent rats [4,5,6]. In addition to nicotine's potential harmful effects, cigarette smoke contains numerous toxic chemicals that could contribute to the significant adverse health consequences in individuals who are chronic long-term cigarette smokers, including anatomical and chemical brain changes [7,8,9]. Understanding the vulnerabilities of the nicotine-dependent brain will aid in the development of successful

treatment strategies to help us conquer this devastating and difficult to treat addiction.

Voxel-based morphometry (VBM) studies have examined the effects of chronic smoking on the brain by comparing gray matter volume (GMV) in otherwise healthy nicotine dependent individuals (NDs) to nonsmoking individuals (Controls) with inconsistent results [10,11,12,13,14,15,16]. Inconsistencies may be related to differences in methodologies and/or the populations studied. For example, although some studies identified the thalamus as a region of lower GMV in NDs [11,12], this was not observed in other studies [13,14,15,17]. Further, not all studies showed correlations with relevant smoking-related behavior. Specifically, Gallinat et al. (2006) reported that greater number of pack-years were associated with less GMV in frontal and temporal lobes; whereas, Zhang et al. (2011a) found an association between greater number of

pack-years and less GMV in the left prefrontal cortex, but only in high pack-year NDs [14]. These studies, and others, suggest structural abnormalities in ND that may be related to lifetime cigarette exposure and that additional study in larger cohorts is necessary.

Although previous research highlights the adverse effects of cigarette smoking on neural structure, sex differences were not examined. Sex-specific patterns of regional GMV differences among smokers and between smokers and healthy individuals might be expected, given that numerous studies report sex differences in regional cortical and subcortical volumes in various brain disorders [18,19] including drug and alcohol dependence [20,21]. Preclinical and clinical studies indicate that females are more vulnerable to cigarette smoking initiation, nicotine dependence and have more difficulty quitting than males [22,23]. Although the exact mechanisms underlying these sex differences remain unknown, research suggests that sex differences in neural functioning and organization may influence aspects of nicotine dependence [24,25]. Knowledge of sex-specific neurophysiological anomalies in GMV associated with nicotine and cigarette smoking may provide a methodological framework for personalized therapies to improve relapse rates.

To this end, the goal of the current study was to examine differences in GMV and sex differences in GMV between NDs and matched Controls. Based on the known sex-specific differences in brain function and nicotine dependence, we hypothesized that male and female smokers would show different patterns of GMV alterations. Within ND individuals, we explored whether regional GMV was associated with cigarette use and nicotine dependence. The VBM tool in Statistical Parametric Mapping software (SPM8; Wellcome Department of Cognitive Neurology; <http://www.fil.ion.ucl.ac.uk/spm>) was used to accomplish this goal.

## Methods

### 1. Subjects

Physically healthy NDs and Controls were recruited via advertisements, flyers, and referrals for fMRI studies at the University of Pennsylvania. After completing an initial telephone screen, individuals were given a description of their respective study and written informed consent was obtained. Screening procedures included a history and physical examination and a psychological assessment. The Fagerstrom Test for Nicotine Dependence (FTND) [26] assessed severity of nicotine dependence among NDs. Exclusion criteria included current DSM-IV Axis I diagnoses (other than nicotine dependence in smokers), lifetime history of head injury with loss of consciousness for more than 3 minutes, significant alcohol or drug history, contraindications for MRI, and clinically significant medical conditions. Urine drug screens verified the absence of illicit drugs in all subjects and the absence of nicotine and its major metabolite, cotinine, in Controls. Eighty NDs (41 males) and 80 Controls (41 males) matched by age, sex, and education years, met inclusion/exclusion criteria (Table 1). The study adhered to the Declaration of Helsinki and was approved by the University of Pennsylvania Institutional Review Board.

### 2. MR Acquisition

NDs smoked a cigarette to satiety approximately 45 minutes prior to scan acquisition. Imaging data were acquired on a Siemens 3 Tesla Trio whole-body scanner (Erlangen, Germany) at the Hospital of the University of Pennsylvania using a product eight-channel array coil. High-resolution T1-weighted anatomical

**Table 1. Characteristics of nicotine-dependent cigarette smokers and non-smoking controls.**

|                         | NDs (n = 80) |      |        |      | Controls (n = 80) |      |        |      |
|-------------------------|--------------|------|--------|------|-------------------|------|--------|------|
|                         | Male         |      | Female |      | Male              |      | Female |      |
|                         | n            | %    | n      | %    | n                 | %    | n      | %    |
|                         | 41           | 51.3 | 39     | 48.7 | 41                | 51.3 | 39     | 48.7 |
|                         | Mean         | SD   | Mean   | SD   | Mean              | SD   | Mean   | SD   |
| Age (years)             | 35.7         | 11.1 | 31.9   | 10.6 | 33.2              | 7.5  | 30.9   | 7.2  |
| Education level         | 14.1         | 2.0  | 14.8   | 2.4  | 13.6              | 2.2  | 14.2   | 2.0  |
| Years smoking           | 16.0         | 11.3 | 12.0   | 8.4  | –                 | –    | –      | –    |
| CPD <sup>a</sup>        | 16.1         | 6.1  | 13.2   | 5.6  | –                 | –    | –      | –    |
| FTND                    | 4.6          | 1.7  | 4.3    | 1.9  | –                 | –    | –      | –    |
| Pack years <sup>b</sup> | 13.0         | 9.9  | 7.9    | 6.0  | –                 | –    | –      | –    |

SD, standard deviation; CPD, cigarettes smoked per day; FTND, Fagerstrom Test for Nicotine Dependence; Pack-years, smoking years X CPD/20.

<sup>a</sup>Male NDs > female NDs,  $t(79) = 2.21$ ,  $p = 0.03$ .

<sup>b</sup>Male NDs > female NDs,  $t(79) = 2.81$ ,  $p = 0.007$ .

doi:10.1371/journal.pone.0104102.t001

images were obtained using a three dimensional- magnetization prepared rapid acquisition gradient echo (3D-MPRAGE) sequence (TR = 1620 ms, TE = 3 ms, flip angle = 15°, 160 contiguous slices of 1.0 mm).

### 3. Data Processing

Data were preprocessed using statistical mapping software, version 8 (SPM8; Wellcome Department of Cognitive Neurology, London, UK; [www.fil.ion.ucl.ac/spm](http://www.fil.ion.ucl.ac/spm)) implemented in MatlabR2013 (MathWorksInc., Natick, MA, USA). Each subject's MR images were checked for structural abnormalities and reoriented to the anterior-posterior commissure line. Reorientated images were segmented into gray matter, white matter and cerebral spinal fluid in native space using the New Segmentation algorithm implemented in SPM8. This iterative procedure results in more accurate tissue classification. The resulting rigidly aligned and resliced gray and white matter tissue maps were imported into DARTEL (Diffeomorphic Anatomical Registration using Exponentiated lie Algebra), an advanced high-dimensional diffeomorphic registration algorithm within SPM8 that has been shown to improve spatial precision [27,28]. Subsequently, the study-specific gray matter templates were created from the imported maps of all subjects. The final average template was generated after six iterations by averaging all of the aligned images. During successive iterations, flow fields for each subject's images were yielded to parameterized deformations by warping to the template and then these were employed in the modulation step. The gray matter map of each subject was transformed to Montreal Neurological Institute (MNI) space by applying the deformation parameters. Next, Jacobian modulation was applied to the warped images of gray matter. The normalized modulated images were then smoothed with an 8-mm full width half maximum isotropic Gaussian kernel for statistical analyses. Data were visually inspected following each pre-processing step to ensure integrity.

### 4. Data analysis

Statistical parametric maps were created in SPM8 to perform between-group comparisons using the gray matter tissue segmentation output by DARTEL. A 2x2 full factorial model was used to explore differences in GMV between NDs and Controls, NDs and Controls by sex, and group X sex interactions. As it has been demonstrated that both age and total global brain measures yield significant effects on regional GMV [29,30], covariates included age and an estimate of total global GMV. Whole-brain GMV analyses were conducted using random field-based cluster-size testing, with structural differences considered significant if  $p \leq 0.001$ , with a whole brain FWE-corrected cluster probability of  $p < 0.025$ . GMV in clusters that differed between NDs and Controls were extracted using the MarsBar region of interest toolbox (<http://marsbar.sourceforge.net/>) and exported to IBM SPSS Statistics 19.0 (Armonk, NY) to investigate possible associations between GMV and cigarette use and dependence.

## Results

Table 1 provides subject characteristics. Analysis of variance (ANOVA) was used to compare subject characteristics across groups. There were no significant differences between NDs and Controls on age, sex, or education years. Consistent with previously reported sex-specific differences in smoking behavior [31,32,33], male NDs smoked a greater number of cigarettes per day and had higher pack-years than their female counterparts. Total global GMV was not different between NDs and Controls (591.50 mm<sup>3</sup>, SD 68.56 and 603.67 mm<sup>3</sup>, SD 73.58,  $p = 0.27$ ). As

expected, total global GMV was greater in male NDs (629.02 mm<sup>3</sup>, SD 60.03) compared to female NDs (553.96 mm<sup>3</sup>, SD 55.01;  $p < 0.001$ ) and male Controls (639.11 mm<sup>3</sup>, SD 68.62) compared to female Controls (561.87 mm<sup>3</sup>, SD 52.64;  $p < 0.001$ ).

Table 2 provides a full summary of GMV differences. Among NDs compared to Controls, less GMV was observed in the thalamus, extending through to the medial orbitofrontal cortex, and bilateral cerebellum whereas greater GMV was observed in bilateral putamen and right parahippocampus (see Figure 1 and <http://franklinbrainimaging.com>: Available upon publication). There were sex-specific volume differences between NDs and Controls. Female NDs had less GMV than female Controls in the thalamus, left cerebellum, left ventrolateral prefrontal cortex, and medial orbitofrontal cortex. There were no brain regions in which female NDs had greater GMV than female Controls. ND males had significantly less GMV in the thalamus and bilateral cerebellum and significantly greater GMV in the bilateral parahippocampus (extending into the left putamen) compared to male Controls. There were no significant group X sex interactions.

Within the group of ND individuals, correlation analyses revealed that number of pack years was positively correlated with GMV in the left putamen in males ( $r = .38$ ,  $p = 0.018$ ). Additionally, GMV in the left cerebellum approached a significant inverse correlation with number of pack years in males ( $r = -.31$ ,  $p = 0.054$ ). No significant associations were found between GMV and cigarettes per day and FTND among all NDs or among male or female NDs.

## Discussion

The purpose of this study was two-fold. Given the impact that chronic cigarette smoking may have on brain structure, the first goal was to conduct a systematic GMV study in a large cohort of NDs compared to Controls using an advanced registration method that provides greater sensitivity than traditional VBM. Additionally, given the importance of the influence of sex on brain structure and function in a variety of disorders, a second goal was to characterize sex differences in GMV in NDs, extending our knowledge of brain morphology in nicotine addiction. Among NDs compared to Controls, less GMV was observed in the thalamus, extending through to the medial orbitofrontal cortex (mOFC) and bilateral cerebellum whereas greater GMV was observed in bilateral putamen and right parahippocampus. Less thalamic GMV was observed in both female and male NDs. Female NDs also had lower GMV in the left cerebellum and in the ventral medial cortex and mOFC with no areas of greater GMV. Male NDs had lower GMV in bilateral cerebellum and greater GMV in bilateral parahippocampus extending into the left putamen. Positive associations were observed between pack years and GMV in the left putamen in male NDs. Additionally, GMV in the left cerebellum approached a significant inverse correlation with pack years in male NDs.

The strongest difference between NDs and Controls identified in the current report was observed in the thalamus wherein less GMV was detected in NDs as a group and in both male and female NDs. In humans, the thalamus has the highest density of nicotinic acetylcholine receptors of any brain region [34,35], and thus, constant bombardment of these receptors by chronic cigarette smoking may make it a prime target for potential morphometric anomalies. Indeed, cigarette smoking has been shown to correlate with increased nicotine binding in the human thalamus [36]. Alternatively, and not mutually exclusive, this region may be particularly susceptible to one or more of the numerous carcinogens found in cigarette smoke (e.g., acetalde-

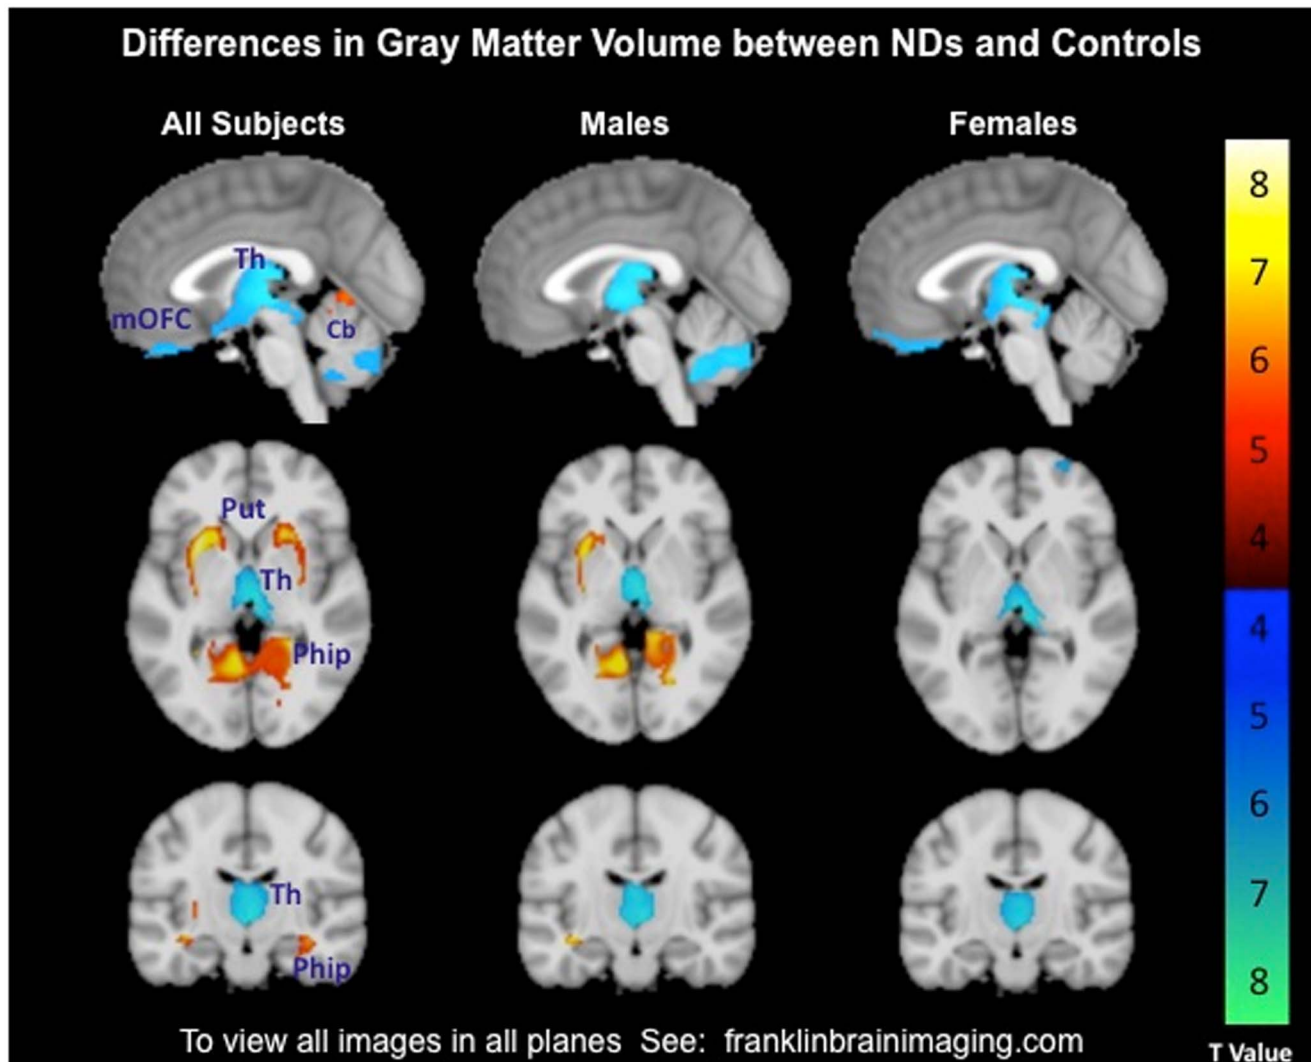

**Figure 1. Differences in gray matter volume (GMV) between nicotine dependent (NDs; n = 80) and control subjects (Controls; n = 80) shown in all subjects and separately by sex (NDs, n = 41 male; Controls, n = 41 male).** Representative MRI sagittal, axial, and coronal brain slices analyzed in SPM8 and overlain on the Montreal Neurological Institute brain. Slice shown is centered within the thalamus (x, y, z; 0, -16, 0). Hot colors represent regions of greater GMV, while cool colors represent regions of less GMV in NDs compared to Controls. T values range from 4.42 to 8.06, significant in whole brain analysis at  $p < 0.001$ , and FWE cluster-corrected  $p < 0.025$ . Images are displayed neurologically. An interactive visual display of all brain data in all three planes can be found at <http://franklinbrainimaging.com> (Available upon publication). doi:10.1371/journal.pone.0104102.g001

hyde, arsenic, benzene) [9]. The finding of less thalamic GMV is consistent with the findings of some studies [11,12] but not all [10,14,15]. Given that cigarette smoking behavior is multi-faceted and complex, and that various aspects of the behavior are modulated by both known [37,38,39] and unknown factors, we speculate that differences in other characteristics across studies are contributing to the variable results.

The cerebellum was also identified as a region wherein less GMV was observed in NDs compared to Controls; however, sex-specific analyses show this finding to be stronger and bilateral in male NDs. Yu and colleagues (2011) studied only males and also identified a region of the cerebellum (bilateral) as a region of lower GMV in ND [13]. Kuhn and colleagues (2012) conducted a GMV study in NDs versus Controls specifically targeting the cerebellum [17]. The study, conducted in both sexes, showed significantly less GMV in the right cerebellum compared to Controls, with peak coordinates similar to those observed in the current study. Our

results provoke speculation that the cerebellar effects observed by Kuhn et al. (2012) may be sex-specific. NDs show greater density of nicotine binding in the cerebellum (from 70–200%) compared to nonsmoking individuals [40], and brain blood flow in the cerebellum is increased by cigarette smoking [41,42]. Further, plasma nicotine levels, which are elevated by smoking cigarettes, correlate with increased cerebellar blood flow [41]. Thus, potential pathophysiological effects associated with chronic smoking could at least partially account for this result. The effect may be stronger in males because of their greater exposure to cigarettes (i.e., greater number of pack-years).

The cluster of less thalamic GMV in NDs extended medially through the brain to the medial frontal gyrus, including the mOFC. GMV in prefrontal regions was unchanged in male NDs compared to male Controls but was less in female NDs compared to female Controls. Most previous studies have demonstrated reduced prefrontal GMV in NDs [10,11,12,16] while some studies

**Table 2.** Clusters of gray matter volume differences between NDs and Controls.

| Region                                | Cluster size (voxels) | MNI coordinates |     |     | T-value | p value FWE cor |
|---------------------------------------|-----------------------|-----------------|-----|-----|---------|-----------------|
|                                       |                       | x               | y   | z   |         |                 |
| <b>Group effect</b>                   |                       |                 |     |     |         |                 |
| <b>NDs&lt;Controls</b>                |                       |                 |     |     |         |                 |
| Thalamus                              | 1851                  | 4               | -18 | 2   | 8.06    | 0.001           |
| Medial prefrontal cortex <sup>a</sup> |                       | 2               | 36  | -30 | 4.78    |                 |
| L Cerebellum                          | 2827                  | -40             | -70 | -42 | 6.19    | 0.001           |
| R Cerebellum                          | 1987                  | 30              | -50 | -50 | 4.83    | 0.001           |
| <b>NDs&gt;Controls</b>                |                       |                 |     |     |         |                 |
| L Putamen                             | 777                   | -28             | 8   | -8  | 7.16    | 0.001           |
| R Putamen                             | 546                   | 22              | 18  | 4   | 5.44    | 0.007           |
| R Parahippocampus                     | 2319                  | 20              | -40 | -8  | 6.32    | 0.001           |
| <b>Sex effect</b>                     |                       |                 |     |     |         |                 |
| <b>Females: NDs&lt;Controls</b>       |                       |                 |     |     |         |                 |
| Thalamus                              | 891                   | 6               | -26 | -2  | 7.07    | 0.001           |
| L Cerebellum                          | 943                   | -40             | -72 | -42 | 4.80    | 0.001           |
| Ventral medial prefrontal cortex      | 540                   | 36              | 60  | -10 | 4.48    | 0.007           |
| Medial orbitofrontal cortex           | 857                   | -6              | 24  | -28 | 4.42    | 0.001           |
| <b>Females: NDs&gt;Controls</b>       |                       |                 |     |     |         |                 |
| No significant clusters               |                       |                 |     |     |         |                 |
| <b>Males: NDs&lt;Controls</b>         |                       |                 |     |     |         |                 |
| Thalamus                              | 777                   | 4               | -14 | 0   | 5.45    | 0.001           |
| R Cerebellum                          | 1909                  | 28              | -54 | -50 | 5.15    | 0.001           |
| L Cerebellum                          | 1627                  | -32             | -64 | -52 | 4.60    | 0.006           |
| <b>Males: NDs&gt;Controls</b>         |                       |                 |     |     |         |                 |
| R Parahippocampus                     | 660                   | 18              | -38 | -8  | 6.30    | 0.001           |
| L Parahippocampus                     | 472                   | -34             | -10 | -14 | 5.28    | 0.012           |
| L Putamen <sup>b</sup>                |                       | -30             | 10  | -2  | 5.13    |                 |

All clusters are significant in whole brain analysis at  $p < 0.001$ , and FWE cluster-corrected  $p < 0.025$ .

Coordinates listed are in Montreal Neurological Institute (MNI) space. L, left; R, right.

<sup>a</sup>extended from within the thalamic cluster.

<sup>b</sup>extended from within the left parahippocampal cluster.

doi:10.1371/journal.pone.0104102.t002

have not [14,15]. Our results showing that this finding may be 'carried' by female NDs, may help explain these inconsistencies. Some support for this idea is provided by Yu and colleagues (2011), who studied only males, and did not find differences between NDs and Controls in prefrontal regions [13]. Given the role of the medial ventral regions of the prefrontal cortex in reward [43,44] and the development and maintenance of addiction [45,46], it is surprising that this finding was observed only in females, however resting cerebral blood flow (CBF) differs between male and female NDs in the mOFC [24], which could potentially lead to differences in regional GMV. Further, the mOFC is heavily involved in inhibition of behavior [47]. Less GMV in this region in female NDs may be related to the greater difficulty female NDs have in quitting smoking compared to male NDs [22].

In the present study, NDs had more GMV than Controls in the bilateral putamen. Striatal abnormalities are thought to underlie habitual, compulsive drug seeking and use [48,49] and other psychiatric disorders characterized by repetitive, compulsive behaviors [50,51]. Further, a meta-analysis has shown that severity of compulsivity has been associated with greater putamen

GMV [52]. As such, the greater putamen GMV observed in NDs may be associated with long-term, compulsive cigarette smoking behavior. This suggestion is mildly supported by the finding of a positive association between pack years and GMV in the left putamen in male NDs.

In the present study, the parahippocampus showed greater GMV in NDs compared to Controls, but sex-specific analyses showed greater GMV in the parahippocampus only in male NDs. In direct comparisons between sexes we have shown that appetitive smoking cues (reminders to smoke) evoke greater bilateral hippocampal/amygdalar activation among males [24]. The hippocampus and amygdala are structures associated with emotional and drug memories [53,54] and as such, our previous findings may be explained by sex-specific memory-related differences to smoking cues. Specifically, females may be more efficient at retrieving autobiographical memories [55,56], while males show greater hippocampal activation to autobiographical memories [57]. Thus, males may require greater memory-related, hippocampal-amygdalar brain activity when retrieving cue-associated memories. Increased activity in brain is theoretically

coupled to the delivery of life-sustaining blood and nutrients. One might tentatively speculate that chronic increased activity in this region, may lead to a relative expansion in GMV.

We hypothesized that the toxic chemicals found in tobacco smoke cause detrimental effects on brain morphology. Using pack-years as an estimate of lifetime cigarette smoke exposure, we explored whether associations existed between GMV and cigarette exposure. Associations between GMV and pack years were observed only in males; positive associations were observed in the putamen and negative associations were observed in the cerebellum. These results are inconsistent with the extant literature, which itself is inconsistent. Specifically, Gallinat et al. (2006) reported that greater pack-years were associated with less GMV in frontal and temporal lobes; whereas, Zhang et al. (2011a) found an association between greater pack-years and less GMV in the left prefrontal cortex, but only in high pack-year NDs [11,14]. In a separate report, Zhang et al. (2011b) observed a trend in dorsolateral prefrontal cortex, yet no correlations were observed in the ROI analysis conducted by Brody and colleagues [10]. Combined, the existing literature and our report do not provide conclusive evidence that exposure to cigarette smoke, as defined by pack-years, affects brain morphometry. This is not completely unexpected due to the intrinsic confounds of human neuroimaging studies where subjective measures are used to draw associations between behavior and brain. Pack-years is a measure derived by the subjective responses of individuals to only two items regarding smoking history. The measure assumes that smoking behavior has not changed since initiation and that accurate reports can be provided. Although perfecting the pack-year measure will not abolish all of its inherent flaws, a better measure could and should be developed to examine the effects of cigarette smoke exposure on GMV.

As with any study conducted in drug-dependent individuals, inferences about what differences between groups in GMV signify cannot exclude the possibility that brain volume differed prior to cigarette smoking initiation. Pre-existing differences in GMV could predispose an individual to a number of aspects of drug use including experiencing increased positive responses to the reinforcing properties of the drug, reduced negative responses to its aversive properties, and/or reduced ability to inhibit aberrant behavior.

It should be noted that GMV differences between NDs and Controls in this and other studies could at least in part be a transient difference modulated by recent smoking. The use of T1-weighted scans to identify change in brain structure *in vivo* in

humans has vulnerability: the T1 relaxation time for arterial blood and gray matter are not clearly distinguishable and therefore, apparent reported GMV findings might be at least partially related to changes in CBF or other physiological signals [58,59]. For example, we observed medication-induced decreases in GMV in the cingulate and other regions that overlapped with changes in CBF following just one dose of medication [60]. If a single dose of medication can alter brain volume as indexed by VBM, it is conceivable that recent smoking could have a similar effect, especially in light of evidence that cigarette smoking induces regional alterations in CBF [41,42,61]. In the current study, NDs smoked a cigarette approximately 45 minutes prior to scan acquisition. Given that physiological responses to cigarette smoking dissipate within 20 min [plasma nicotine levels peak at 5 minutes and return to a steady concentration within 10 minutes [41] and myocardial blood flow measured after smoking returns to normal within 50 minutes [62], this should not be a confounding factor, but it cannot be ruled out.

This study is limited in that we did not obtain a full alcohol and/or illicit drug history on the subjects. However, having a significant alcohol and/or drug history was an exclusion criterion for both groups and urine drug screens verified the absence of illicit drugs in all subjects.

This study, conducted in a large cohort of NDs and matched Controls, contributes to our knowledge of brain morphology in nicotine addiction by providing in-depth analyses using an advanced registration technique and by expanding our knowledge on sex-specific effects in cigarette smokers. Identifying brain vulnerabilities with respect to sex provides a methodological framework for personalized therapies to improve relapse rates for both males and females.

## Acknowledgments

The authors would like to thank the clinical and support staff, with special thanks to Melanie Maron (Study Coordinator), at the Center for the Studies of Addiction, Perelman School of Medicine at the University of Pennsylvania and the MRI technical staff at the Hospital of the University of Pennsylvania.

## Author Contributions

Conceived and designed the experiments: TF RRW AC. Performed the experiments: BJ JM NH HR TF. Analyzed the data: KJ TF RRW. Contributed reagents/materials/analysis tools: HR TF AC. Contributed to the writing of the manuscript: TF RRW HR AC JM BJ KJ.

## References

- Centers for Disease Control and Prevention (2008) Smoking-Attributable Mortality, Years of Potential Life Lost, and Productivity Losses—United States, 2000–2004.
- Baillie AJ, Mattick RP, Hall W (1995) Quitting smoking: estimation by meta-analysis of the rate of unaided smoking cessation. *Australian journal of public health* 19: 129–131.
- Hughes JR, Shiffman S, Callas P, Zhang J (2003) A meta-analysis of the efficacy of over-the-counter nicotine replacement. *Tobacco control* 12: 21–27.
- Dwyer JB, McQuown SC, Leslie FM (2009) The dynamic effects of nicotine on the developing brain. *Pharmacology & therapeutics* 122: 125–139.
- Trauth JA, Seidler FJ, McCook EC, Slotkin TA (1999) Adolescent nicotine exposure causes persistent upregulation of nicotinic cholinergic receptors in rat brain regions. *Brain research* 851: 9–19.
- Slotkin TA (2002) Nicotine and the adolescent brain: insights from an animal model. *Neurotoxicology and teratology* 24: 369–384.
- Swan GE, Lessov-Schlaggar CN (2007) The effects of tobacco smoke and nicotine on cognition and the brain. *Neuropsychology review* 17: 259–273.
- Longstreth WT, Jr., Bernick C, Fitzpatrick A, Cushman M, Knepper L, et al. (2001) Frequency and predictors of stroke death in 5,888 participants in the Cardiovascular Health Study. *Neurology* 56: 368–375.
- The National Toxicology Program on behalf of the Secretary HaHS, Kathleen Sebelius (2011) Report on Carcinogens. Department of Health and Human Services.
- Brody AL, Mandelkern MA, Jarvik ME, Lee GS, Smith EC, et al. (2004) Differences between smokers and nonsmokers in regional gray matter volumes and densities. *Biological psychiatry* 55: 77–84.
- Gallinat J, Meisenzahl E, Jacobsen LK, Kalus P, Bierbrauer J, et al. (2006) Smoking and structural brain deficits: a volumetric MR investigation. *The European journal of neuroscience* 24: 1744–1750.
- Liao Y, Tang J, Liu T, Chen X, Hao W (2012) Differences between smokers and non-smokers in regional gray matter volumes: a voxel-based morphometry study. *Addiction biology* 17: 977–980.
- Yu R, Zhao L, Lu L (2011) Regional grey and white matter changes in heavy male smokers. *PLoS one* 6: e27440.
- Zhang X, Salmeron BJ, Ross TJ, Geng X, Yang Y, et al. (2011a) Factors underlying prefrontal and insula structural alterations in smokers. *NeuroImage* 54: 42–48.
- Zhang X, Salmeron BJ, Ross TJ, Gu H, Geng X, et al. (2011b) Anatomical differences and network characteristics underlying smoking cue reactivity. *NeuroImage* 54: 131–141.
- Morales AM, Lee B, Hellemann G, O'Neill J, London ED (2012) Gray-matter volume in methamphetamine dependence: cigarette smoking and changes with

- abstinence from methamphetamine. *Drug and alcohol dependence* 125: 230–238.
17. Kuhn S, Romanowski A, Schilling C, Mobascher A, Warbrick T, et al. (2012) Brain grey matter deficits in smokers: focus on the cerebellum. *Brain structure & function* 217: 517–522.
  18. Cahill L (2006) Why sex matters for neuroscience. *Nature reviews Neuroscience* 7: 477–484.
  19. Cosgrove KP, Mazure CM, Staley JK (2007) Evolving knowledge of sex differences in brain structure, function, and chemistry. *Biological psychiatry* 62: 847–855.
  20. Rando K, Tuit K, Hannestad J, Guarnaccia J, Sinha R (2013) Sex differences in decreased limbic and cortical grey matter volume in cocaine dependence: a voxel-based morphometric study. *Addiction biology* 18: 147–160.
  21. Pfefferbaum A, Rosenbloom M, Deshmukh A, Sullivan E (2001) Sex differences in the effects of alcohol on brain structure. *The American journal of psychiatry* 158: 188–197.
  22. Becker JB, Hu M (2008) Sex differences in drug abuse. *Frontiers in neuroendocrinology* 29: 36–47.
  23. Lynch WJ, Sofuoglu M (2010) Role of progesterone in nicotine addiction: evidence from initiation to relapse. *Experimental and clinical psychopharmacology* 18: 451–461.
  24. Wetherill RR, Young KA, Jagannathan K, Shin J, O'Brien CP, et al. (2013) The impact of sex on brain responses to smoking cues: a perfusion fMRI study. *Biology of sex differences* 4: 9.
  25. Wetherill RR, Jagannathan K, Shin J, Franklin TR (2014) Sex differences in resting state neural networks of nicotine-dependent cigarette smokers. *Addictive behaviors* 39: 789–792.
  26. Fagerstrom KO, Schneider NG (1989) Measuring nicotine dependence: a review of the Fagerstrom Tolerance Questionnaire. *Journal of Behavioral Medicine* 12: 159–182.
  27. Ashburner J (2007) A fast diffeomorphic image registration algorithm. *NeuroImage* 38: 95–113.
  28. Mak HK, Zhang Z, Yau KK, Zhang L, Chan Q, et al. (2011) Efficacy of voxel-based morphometry with DARTEL and standard registration as imaging biomarkers in Alzheimer's disease patients and cognitively normal older adults at 3.0 Tesla MR imaging. *Journal of Alzheimer's disease* : JAD 23: 655–664.
  29. Good CD, Johnsrude I, Ashburner J, Henson RN, Friston KJ, et al. (2001) Cerebral asymmetry and the effects of sex and handedness on brain structure: a voxel-based morphometric analysis of 465 normal adult human brains. *NeuroImage* 14: 685–700.
  30. Good CD, Johnsrude IS, Ashburner J, Henson RN, Friston KJ, et al. (2001b) A voxel-based morphometric study of ageing in 465 normal adult human brains. *NeuroImage* 14: 21–36.
  31. Drum ML, Shiovitz-Ezra S, Gaumer E, Lindau ST (2009) Assessment of smoking behaviors and alcohol use in the national social life, health, and aging project. *The journals of gerontology Series B, Psychological sciences and social sciences* 64 Suppl 1: i119–130.
  32. Kandel DB, Chen K (2000) Extent of smoking and nicotine dependence in the United States: 1991–1993. *Nicotine & tobacco research* : official journal of the Society for Research on Nicotine and Tobacco 2: 263–274.
  33. Buist AS, Connett JE, Miller RD, Kanner RE, Owens GR, et al. (1993) Chronic Obstructive Pulmonary Disease Early Intervention Trial (Lung Health Study). Baseline characteristics of randomized participants. *Chest* 103: 1863–1872.
  34. Picard F, Sadaghiani S, Leroy C, Courvoisier DS, Maroy R, et al. (2013) High density of nicotinic receptors in the cingulo-insular network. *NeuroImage* 79: 42–51.
  35. Paterson D, Nordberg A (2000) Neuronal nicotinic receptors in the human brain. *Progress in neurobiology* 61: 75–111.
  36. Breese CR, Marks MJ, Logel J, Adams CE, Sullivan B, et al. (1997) Effect of smoking history on [3H]nicotine binding in human postmortem brain. *The Journal of pharmacology and experimental therapeutics* 282: 7–13.
  37. Bergen AW, Conti DV, Van Den Berg D, Lee W, Liu J, et al. (2009) Dopamine genes and nicotine dependence in treatment-seeking and community smokers. *Neuropsychopharmacology* : official publication of the American College of Neuropsychopharmacology 34: 2252–2264.
  38. Franklin TR, Wang Z, Li Y, Suh JJ, Goldman M, et al. (2011) Dopamine transporter genotype modulation of neural responses to smoking cues: confirmation in a new cohort. *Addiction biology* 16: 308–322.
  39. Wetherill RR, Jagannathan K, Lohoff FW, Ehrman R, O'Brien CP, et al. (2012) Neural correlates of attentional bias for smoking cues: modulation by variance in the dopamine transporter gene. *Addiction biology*.
  40. Court JA, Lloyd S, Thomas N, Piggott MA, Marshall EF, et al. (1998) Dopamine and nicotinic receptor binding and the levels of dopamine and homovanillic acid in human brain related to tobacco use. *Neuroscience* 87: 63–78.
  41. Domino EF, Ni L, Xu Y, Koeppe RA, Guthrie S, et al. (2004) Regional cerebral blood flow and plasma nicotine after smoking tobacco cigarettes. *Progress in neuro-psychopharmacology & biological psychiatry* 28: 319–327.
  42. Zubieta JK, Heitzeg MM, Xu Y, Koeppe RA, Ni L, et al. (2005) Regional cerebral blood flow responses to smoking in tobacco smokers after overnight abstinence. *The American journal of psychiatry* 162: 567–577.
  43. Rolls ET (2004) The functions of the orbitofrontal cortex. *Brain and cognition* 55: 11–29.
  44. Krügelbach ML, Rolls ET (2004) The functional neuroanatomy of the human orbitofrontal cortex: evidence from neuroimaging and neuropsychology. *Progress in neurobiology* 72: 341–372.
  45. Goldstein RZ, Tomasi D, Rajaram S, Cottone LA, Zhang L, et al. (2007) Role of the anterior cingulate and medial orbitofrontal cortex in processing drug cues in cocaine addiction. *Neuroscience* 144: 1153–1159.
  46. Volkow ND, Fowler JS (2000) Addiction, a disease of compulsion and drive: involvement of the orbitofrontal cortex. *Cerebral cortex* 10: 318–325.
  47. Rolls ET (2004) The functions of the orbitofrontal cortex. *Brain Cogn* 55: 11–29.
  48. Koob GF, Volkow ND (2010) Neurocircuitry of addiction. *Neuropsychopharmacology* : official publication of the American College of Neuropsychopharmacology 35: 217–238.
  49. Everitt BJ, Robbins TW (2005) Neural systems of reinforcement for drug addiction: from actions to habits to compulsion. *Nature neuroscience* 8: 1481–1489.
  50. Hollander E, Anagnostou E, Chaplin W, Esposito K, Haznedar MM, et al. (2005) Striatal volume on magnetic resonance imaging and repetitive behaviors in autism. *Biological psychiatry* 58: 226–232.
  51. Scarone S, Colombo C, Livian S, Abbruzzese M, Ronchi P, et al. (1992) Increased right caudate nucleus size in obsessive-compulsive disorder: detection with magnetic resonance imaging. *Psychiatry research* 45: 115–121.
  52. Radua J, Mataix-Cols D (2009) Voxel-wise meta-analysis of grey matter changes in obsessive-compulsive disorder. *The British journal of psychiatry : the journal of mental science* 195: 393–402.
  53. Mackiewicz KL, Sarinopoulos I, Cleven KL, Nitschke JB (2006) The effect of anticipation and the specificity of sex differences for amygdala and hippocampus function in emotional memory. *Proceedings of the National Academy of Sciences of the United States of America* 103: 14200–14205.
  54. Chase HW, Eickhoff SB, Laird AR, Hogarth L (2011) The neural basis of drug stimulus processing and craving: an activation likelihood estimation meta-analysis. *Biological psychiatry* 70: 785–793.
  55. Andreano JM, Cahill L (2009) Sex influences on the neurobiology of learning and memory. *Learning & memory* 16: 248–266.
  56. Seidlitz L, Diener E (1998) Sex differences in the recall of affective experiences. *Journal of personality and social psychology* 74: 262–271.
  57. Piefke M, Weiss PH, Markowitsch HJ, Fink GR (2005) Gender differences in the functional neuroanatomy of emotional episodic autobiographical memory. *Human brain mapping* 24: 313–324.
  58. Salgado-Pineda P, Delaveau P, Falcon C, Blin O (2006) Brain T1 intensity changes after levodopa administration in healthy subjects: a voxel-based morphometry study. *British journal of clinical pharmacology* 62: 546–551.
  59. Yamasue H, Abe O, Kasai K, Suga M, Iwanami A, et al. (2007) Human brain structural change related to acute single exposure to sarin. *Annals of neurology* 61: 37–46.
  60. Franklin TR, Wang Z, Shin J, Jagannathan K, Suh JJ, et al. (2012) A VBM study demonstrating 'apparent' effects of a single dose of medication on T1-weighted MRIs. *Brain structure & function*.
  61. Rose JE, Behm FM, Westman EC, Mathew RJ, London ED, et al. (2003) PET studies of the influences of nicotine on neural systems in cigarette smokers. *The American journal of psychiatry* 160: 323–333.
  62. Czernin J, Sun K, Brunken R, Botcher M, Phelps M, et al. (1995) Effect of acute and long-term smoking on myocardial blood flow and flow reserve. *Circulation* 91: 2891–2897.
